# Supplementary material
Source: PubMed Central journal article supplement (PMC2938117)
Supplement: supp_M110.000943_mcp.M110.000943-2.pdf [file supp_M110.000943_mcp.M110.000943-2.pdf]

## **Supplementary Materials and Methods**

*Immunofluorescence (IF)* - Cells were grown on collagen-coated coverslips for at least 16h and subsequently washed, fixed, permeabilised, blocked and incubated overnight with primary antibodies as described for PLA. Subsequently, the coverslips were washed with TBST, incubated with FITC-conjugated secondary antibodies in Boehringer Milk Powder/TBST for 1h at room temperature, washed again with TBST, dehydrated, air-dried and embedded in DAPI-containing Citifluor mounting medium (Citifluor Ltd). Fluorescence was detected using a Leica DM-RXA microscope. Images were acquired as sets of color-images and prepared using Photopaint software.
